# 1 **Pollen explains seasonality of flu-like illnesses including** 2 **COVID-19**

3  
4 Martijn J. Hoogeveen<sup>1</sup>, Eric C.M. van Gorp<sup>2</sup>, and Ellen K. Hoogeveen<sup>3</sup>.

5  
6 1. Department Technical Sciences & Environment, Open University, the Netherlands.

7 2. Department of Viroscience and department of Infectious Diseases, Erasmus Medical Centre,  
8 Rotterdam, the Netherlands.

9 3. Department of Internal Medicine, Jeroen Bosch Hospital, Den Bosch, the Netherlands.

10

11 Corresponding author:

12 Martijn J. Hoogeveen

13 De Liesbosch 12d, 3439LC Nieuwegein, the Netherlands

14 [martijn.hoogeveen@icecat.com](mailto:martijn.hoogeveen@icecat.com)

15

## 16 **Abstract**

17 *Current models for flu-like epidemics insufficiently explain multi-cycle seasonality. Meteorological*  
18 *factors alone, including the associated behavior, do not predict seasonality, given substantial climate*  
19 *differences between countries that are subject to flu-like epidemics or COVID-19. Pollen is*  
20 *documented to be allergenic, it plays a role in immuno-activation and defense against respiratory*  
21 *viruses, and seems to create a bio-aerosol that lowers the reproduction number of flu-like viruses.*  
22 *Therefore, we hypothesize that pollen may explain the seasonality of flu-like epidemics, including*  
23 *COVID-19, in combination with meteorological variables.*

**NOTE: This preprint reports new research that has not been certified by peer review and should not be used to guide clinical practice.**

24 *We have tested the Pollen-Flu Seasonality Theory for 2016-2020 flu-like seasons, including COVID-*  
25 *19, in the Netherlands, with its 17.4 million inhabitants. We combined changes in flu-like incidence*  
26 *per 100K/Dutch residents (code: ILI) with pollen concentrations and meteorological data. Finally, a*  
27 *predictive model was tested using pollen and meteorological threshold values, inversely correlated to*  
28 *flu-like incidence.*

29 *We found a highly significant inverse correlation of  $r(224) = -0.41$  ( $p < 0.001$ ) between pollen and*  
30 *changes in flu-like incidence, corrected for the incubation period. The correlation was stronger after*  
31 *taking into account the incubation time. We found that our predictive model has the highest inverse*  
32 *correlation with changes in flu-like incidence of  $r(222) = -0.48$  ( $p < 0.001$ ) when average thresholds*  
33 *of 610 total pollen grains/m<sup>3</sup>, 120 allergenic pollen grains/m<sup>3</sup>, and a solar radiation of 510 J/cm<sup>2</sup> are*  
34 *passed. The passing of at least the pollen thresholds, precludes the beginning and end of flu-like*  
35 *seasons. Solar radiation is a co-inhibitor of flu-like incidence, while temperature makes no difference.*  
36 *However, higher relative humidity increases with flu-like incidence.*

37 *We conclude that pollen is a predictor of the inverse seasonality of flu-like epidemics, including*  
38 *COVID-19, and that solar radiation is a co-inhibitor.*

39

## 40 **1. Introduction**

41 Current models for flu-like epidemics insufficiently explain multi-cycle seasonality. Meteorological  
42 factors alone do not fully explain the seasonality of flu-like epidemics (Tamerius et al., 2011) or  
43 COVID-19 (Yao et al, 2020). Pollen is documented to be allergenic (Klemens et al, 2007;  
44 Rosenwasser, 2011; Howarth, 2000), and it plays a role in immuno-activation (Brandelius et al, 2020.  
45 Furthermore, allergic diseases are absent as a comorbid condition of COVID-19 (Zhang et al., 2020;  
46 Dong et al., 2020). Explaining this, Licari et al. (2020) found that allergic children have a significantly  
47 higher eosinophil count than COVID-19 patients, whereby eosinophils are known to clear viral load,  
48 and contribute to the recovery from viral infections, supposedly including COVID-19 (Lindsley et al,  
49 2020). A further explanation is provided by Jackson et al. (2020), who proved that allergic

50 sensitization and allergen natural exposure are inversely related to ACE-2 expression, whereby it is  
51 known that COVID-19 uses the ACE-2 receptor to enter the host (Wan et al., 2020). Finally, histamine  
52 and IgE serum levels are elevated in allergic rhinitis and asthma patients – an allergenic disease that is  
53 also underreported as comorbid condition for COVID-19 – which downplay certain other anti-viral  
54 responses (plasmacytoid dendritic cells and interferon- $\alpha$ ) but might thus prevent the cytokine storm  
55 and hyper-inflammation that typically mark severe respiratory diseases, including COVID-19 (Carli et  
56 al., 2020). Similarly, it is reported that pollen might suppress interferon- $\lambda$  and pro-inflammatory  
57 chemokine responses in non-allergic subjects and it is found to be correlated to rhinovirus-positive  
58 cases (Gilles et al, 2020), but not to other flu-like virus-positive cases (Nivel.nl, 2020). It is  
59 hypothesized that exposure to and immunization for such ordinary cold viruses, especially corona cold  
60 viruses, could provide some protection against COVID-19, in the same way that the uptake of the  
61 common influenza vaccine seems to be inversely correlated to COVID-19 deaths (Marín-Hernández et  
62 al., 2020).

63 Recently, we identified pollen bio-aerosol as a discrete seasonal factor in inhibiting flu-like epidemics  
64 during the period 2016 to 2019 in the Netherlands (Hoogeveen, 2020). In this epidemiological study,  
65 we found strong inverse correlations between allergenic pollen concentrations and hay fever on the  
66 one hand, and flu-like incidence on the other. The study was based on the persistent observation that  
67 the pollen and flu season predictably alternate each other in moderate climate zones, and the absence  
68 of sufficient meteorological explanations (Tamerius et al., 2011). We further observed that the passing  
69 of pollen threshold values of around 100 allergenic pollen grains/m<sup>3</sup>, reliably mark the onset and  
70 decline of moderate flu-like epidemic lifecycles, and thus might be used as predictor. Such a  
71 concentration of allergenic pollen makes sense, as in an overview of real-life studies, clinical pollen  
72 threshold values are observed between 1 and 400 grains/m<sup>3</sup>, whereby the first symptoms are typically  
73 observed in the range of 1 – 50 grains/m<sup>3</sup> (De Weger et al, 2013), depending on the country, period  
74 and vegetation, and, probably, the susceptibility of the subjects to allergens.

75 The seasonality of respiratory viral infections has been recognized for thousands of years in temperate  
76 regions (Moriyama et al., 2020). Seen in more in detail, virologists observed that cold, and flu-like

77 epidemics (e.g., influenza and corona-caused) “go away in May” in the Northern Hemisphere, while  
78 emerging in the Southern Hemisphere with its opposite seasonality, only to re-emerge in the Northern  
79 Hemisphere during its next autumn and winter, but in a slightly mutated form. Furthermore, all new  
80 flu-like pandemics since 1889 typically emerged in the Northern Hemisphere at the tail-end of  
81 respective flu-seasons (Fox et al., 2017). Clearly, the current COVID-19 pandemic is no exception.  
82 The emergence of COVID-19 and other pandemics at the tail-end of the flu season makes sense. It  
83 takes time for a spontaneous new crossover virus with a sufficiently high reproduction number ( $R_0$ ) –  
84 for SARS-CoV-2 it is estimated to be initially around 3 (Liu et al., 2020) – to develop from patient 0  
85 to become a fully-fledged pandemic during the flu season in the Northern Hemisphere. The Northern  
86 Hemisphere, with its larger and denser populations, is more likely to be the initial breeding ground for  
87 a new flu-like pandemic than the Southern Hemisphere. Furthermore, Fox et al. showed that most flu-  
88 like pandemics are multi-wave, whereby the initial wave at the tail-end of flu season is typically short-  
89 lived. This gives rise to the idea that COVID-19 is also subject to such multi-wave seasonality (Kissler  
90 et al., 2020), because the distribution of community outbreaks is consistent with the behavior of  
91 seasonal respiratory viruses (Sajadi et al., 2020), and has a short wave at the tail end of the 2019/2020  
92 flu-like season in the Northern Hemisphere in the temperate climate zone.

93 Numerous studies try to explain flu-like seasonality with meteorological factors such as sunlight,  
94 including UV radiation (Schuit et al., 2020), temperature and humidity (Chong et al., 2020; Shaman et  
95 al., 2011). However, Postnikov (2016) concluded that ambient temperature is not a good predictor for  
96 influenza seasonality in the Netherlands, and inconsistent correlations also exist for the relationships  
97 between COVID-19 and temperature (Tosepu et al, 2020; Xie & Zhu, 2020; Ma et al 2020; Qi et al,  
98 2020). Furthermore, findings about the relationships between humidity and influenza (Soebiyanto et  
99 al., 2014), and humidity and COVID-19 (Ahmadi et al, 2020; Ma et al, 2020; Qi et al, 2020) are  
100 equally inconsistent. Although UV light is detrimental for the flu-like virus aerosol under laboratory  
101 conditions, associated with immuno-activation (Abhimanyu & Coussens, 2017; Tan & Ruegiger,  
102 2020) and circadian rhythms regulating lung immunity (Nosal et al., 2020), the onset of the flu season,  
103 from mid-August in the Netherlands, coincides with an annual peak in hot, sunny days and is still in

104 the middle of the summer season. According to Yao et al. (2020), for a decrease of COVID-19  
105 infections neither high UV values nor high temperatures are good predictors. The contradictory  
106 findings related to COVID-19, understandably based on the analysis of a limited part of the year and  
107 disease cycle, might be partly due to sub-seasonal bias and unstandardized data-collection methods.  
108 By sub-seasonal bias we mean that if only a part of a season or cycle is analyzed, overly specialized  
109 conclusions can be drawn that cannot be generalized to the whole season or cycle.

110 Nevertheless, these meteorological variables are known factors in flowering and pollen maturation and  
111 dispersion. Meteorological variables, such as increased solar radiation and temperature – among others  
112 the absence of frost – not only trigger flowering and pollen maturation, they also affect the pollen bio-  
113 aerosol formation: dry and warm conditions stimulate pollen to become airborne. Rain, in contrast,  
114 makes pollen less airborne, and cools the bio-aerosol down. Very high humidity levels (RH 98%) are  
115 even detrimental to pollen (Guarnieri, 2006). An RH 98% effect on pollen could thus provide an  
116 alternative explanation as to why flu-like incidence in tropical countries is higher during the rainy  
117 season, and reduced during the rest of the year.

118 We hypothesize that pollen bio-aerosol has an inverse effect on flu-like incidence, including COVID-  
119 19 (see Figure 1), whereby pollen is known to be triggered and influenced by meteorological  
120 variables, which can then jointly explain the seasonality of flu-like incidence. This indirect  
121 explanation of the pollen effect is based on the fact that pollen bio-aerosol and UV light exposure lead  
122 to immuno-activation, and sometimes allergic symptoms, which seem to protect against flu-like  
123 viruses, or at least severe outcomes from them. The indirect pollen effect is explained by the spread of  
124 pollen bio-aerosol under sunny and dry conditions, which *might* absorb viral bio-aerosol, and *might*  
125 also become an agent that leads to an increased exposure of flu-like viruses to virus-degrading solar  
126 radiation, including the UV spectrum, and – possibly – anti-viral phytochemicals in pollen.

127 To further understand the impact of pollen as an environmental factor influencing the life cycle of flu-  
128 like epidemics, the objective of this study is to determine the correlations of pollen and meteorological  
129 variables with (changes in) flu-like incidence and develop and test a discrete predictive model that  
130 combines pollen and meteorological co-inhibitors. Our main hypothesis, therefore, is that pollen is the

131 missing link, jointly explaining with certain meteorological variables, flu-like seasonality, and that a  
 132 compound threshold based factor – combining detected flu-inhibitors – is a good unified predictor of  
 133 such seasonality. Regarding COVID-19, we have limited ourselves to observing whether or not  
 134 COVID-19 at the tail-end of the 2019/2020 flu-like season is able to break with the flu-like seasonality  
 135 pattern.

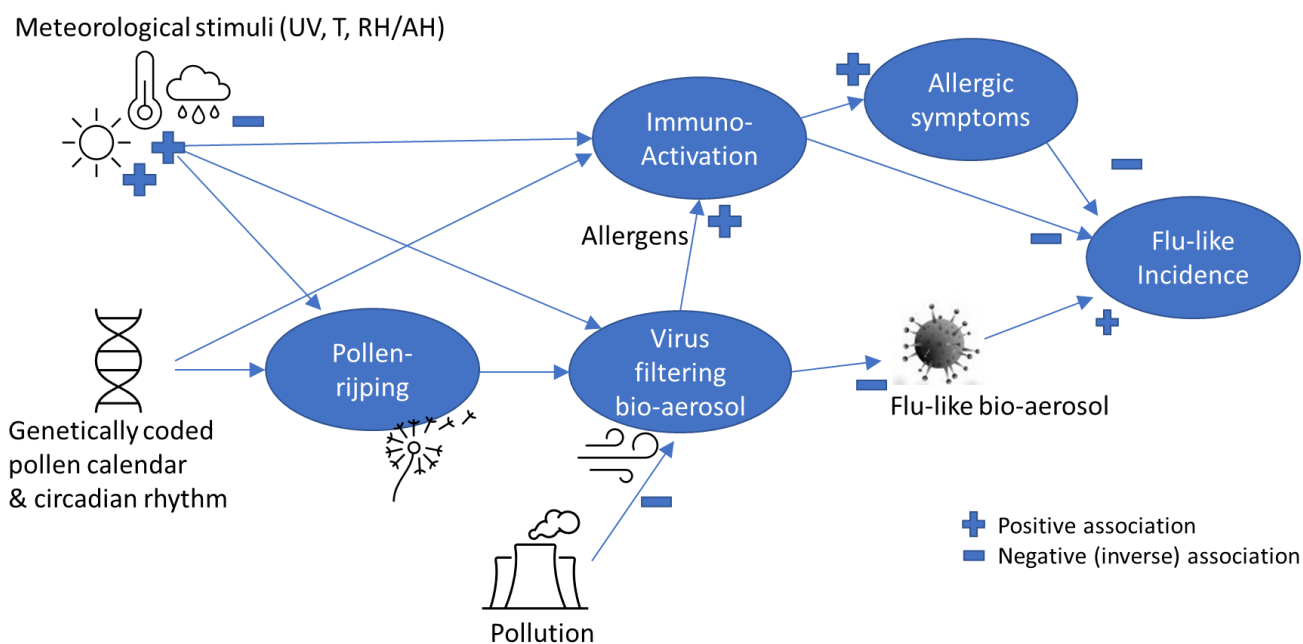

136  
 137 *Figure 1: A simplified theoretic model explaining pollen-flu inverse seasonality, whereby pollen might*  
 138 *have an allergenic (I) and/or immune-triggering (II) function, and/or a direct (III) “antiviral” effect*  
 139 *on flu-like bio-aerosol, inhibiting flu-like epidemic incidence in combination with meteorological*  
 140 *conditions and triggers.*

141  
 142 **2. Methods**

143 To study the relationship between pollen and flu-like incidence in the Netherlands, we used the public  
 144 datasets of Elkerliek Hospital (Elkerliek.nl) about the weekly allergenic, low-level allergenic and total  
 145 pollen concentrations in the Netherlands in grains/m<sup>3</sup>, whereby for 42 types of pollen particles the  
 146 numbers are counted and averaged per day per 1m<sup>3</sup> of air. The common Burkard spore trap was used,  
 147 through which a controlled amount of air was ingested. The applied classification and analysis method

148 conforms to the EACCI (European Academy of Allergology and Clinical Immunology) and the EAN  
149 (European Allergy Network) standards. Allergenic pollen includes nine types of particles that are  
150 classified as moderate (*Corylus*, *Alnus*, *Rumex*, *Plantago* and *Cedrus Libani*), strong (*Betula* and  
151 *Artemisia*), or very strong allergenic (*Poaceae* and *Ambrosia*). Additionally, we included low-level  
152 allergenic pollen concentrations in addition to the allergenic ones because we assume that they will  
153 also have effects. Low-level allergenic pollen includes the other 33 particles that are classified as non-  
154 allergenic to low-level allergenic (*Cupressaceae*, *Ulmus*, *Populus*, *Fraxinus*, *Salix*, *Carpinus*,  
155 *Hippophae*, *Fagus*, *Quercus*, *Aesculus*, *Juglans*, *Acer*, *Platanus*, *Pinus*, *Ilex*, *Sambucus*, *Tilia*,  
156 *Ligustrum*, *Juncaceae*, *Cyperaceae*, *Ericaceae*, *Rosaceae*, *Asteraceae*, *Ranunculaceae*, *Apiaceae*,  
157 *Brassicaceae*, *Urtica*, *Chenopodiaceae*, *Fabaceae*, *Humulus*, *Filipendula*, and *Indet*). Total pollen  
158 concentration is the sum of the average allergenic and low-level allergenic pollen concentrations.  
159 Advantages of using the total pollen metric are that there are hardly any 0 values (only 3 out of 266),  
160 and we did not need to limit ourselves to just parts of the seasonal cycle, which might introduce sub-  
161 seasonal bias into our research. We also assumed that long-distance pollen transport is accounted for,  
162 as foreign pollen will also be counted by a pollen measuring station that works all year round.

163 Furthermore, we used the data from the Dutch State Institute for Public Health (RIVM.nl) gathered by  
164 Nivel (Nivel.nl) about weekly flu-like incidence (WHO code “ILI” - Influenza Like Illnesses) reports  
165 at primary medical care level, per 100,000 citizens in the Netherlands. Primary medical care is the  
166 day-to-day, first-line healthcare given by local healthcare practitioners to their registered clients as  
167 typical for the Netherlands, with its current population of 17.4 million. The reports relate to a positive  
168 RIVM laboratory test for ILI after a medical practitioner diagnosed ILI after a consultation, whether  
169 that leads to hospitalization or not. The ILI metric is according to a standardized WHO method, given  
170 that ILI data is gathered and compared globally. ILI is defined by the WHO as a combination of a  
171 measured fever of  $\geq 38^{\circ}\text{C}$ , and a cough, with an onset within the last 10 days. The flu-like incidence  
172 metric is a weekly average based on a representative group of 40 primary care units, and calculated  
173 using the number of influenza-like reports per primary care unit divided by the number of patients  
174 registered at that unit. This is then averaged for all primary care units and then extrapolated to the



175 complete population. The datasets run from week 1 of 2016 up to week 18 of 2020 (n = 226 data  
176 points) to include the recent COVID-19 pandemic at the tail-end of the 2019/2020 flu-like season. To  
177 underpin the relative importance of COVID-19: SARS-CoV-2 has been detected in the Netherlands  
178 since week 9, 2020. According to the figures of Nivel.nl (2020; see Figure 2), from week 13 onwards  
179 SARS-CoV-2 is the outcome of the (vast) majority of positive tests for patients at primary care level  
180 with flu-like complaints, and by week 18 100% of positive tests indicate SARS-CoV-2 (other tested  
181 viruses are five Influenza A and B subtypes, RSV, Rhinovirus and Enterovirus).

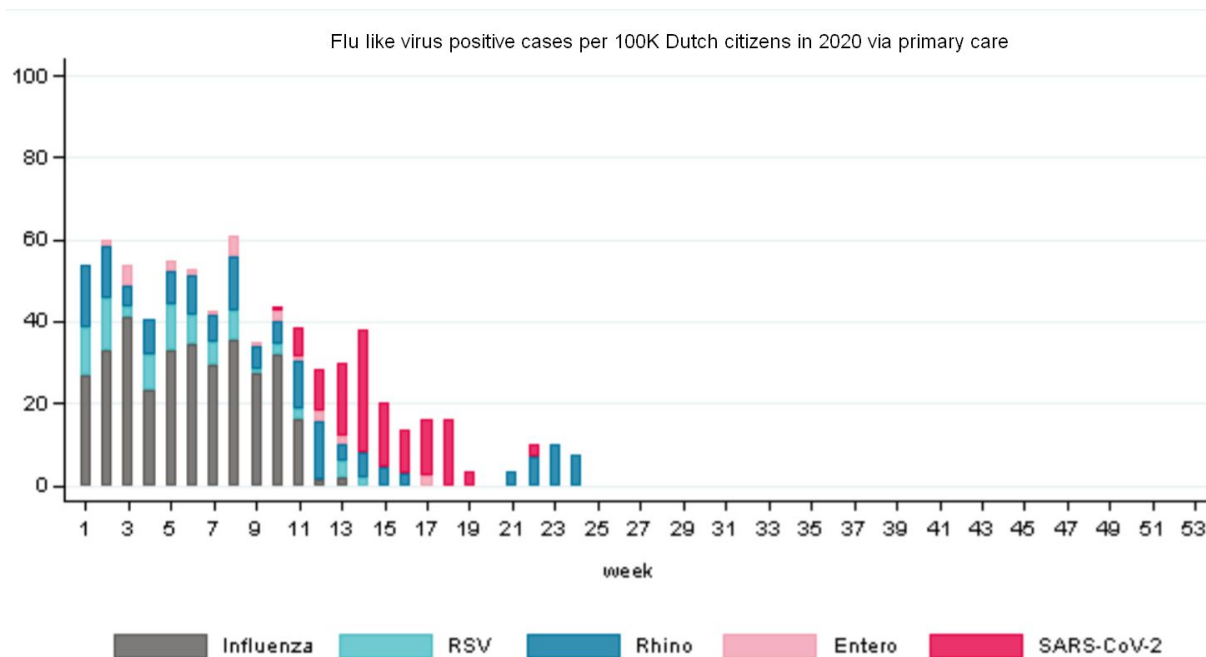

182  
183 *Figure 2: The overview of flu-like virus positive cases in 2020 (till week 24) shows that from week 13*  
184 *onwards SARS-CoV-2 is dominant. The Rhinovirus cases spike is outside the timeline of our research*  
185 *(source: Nivel.nl, 2020).*

186 Furthermore, we also included meteorological datasets from the Royal Dutch Meteorological Institute  
187 (KNMI.nl), including average relative humidity/day, average temperature/day and global solar  
188 radiation in J/cm<sup>2</sup> per day as an indicator of UV radiation. These datasets were obtained from the  
189 KNMI's centrally located De Bilt weather station. Next, we calculated the weekly averages for the  
190 same periods that featured in the other datasets. De Bilt is traditionally chosen as it provides an  
191 approximation of modal meteorological parameters in the Netherlands, which is a small country.



192 Furthermore, all major population centers in the Netherlands, which account for around 70% of the  
193 total Dutch population, are within a radius of only 60 kilometers from De Bilt. We therefore assumed  
194 in this study that the measurements from De Bilt are sufficiently representative for the meteorological  
195 conditions typically experienced by the Dutch population.

196 To test allergenic versus low-level allergenic pollen assumptions, against hay fever and pre-COVID-  
197 19 flu-like incidence, we made use of the hay fever index. The hay fever index is defined as the  
198 turnover for hay fever medication, as reported by all Dutch pharmacies to the Dutch Central Bureau of  
199 Statistics (CBS.nl) and based on respective ATC codes (especially R01A/R01AC). We used a dataset  
200 from week 1 of 2016 up to week 10 of 2019 (n=166 data points), because no further data was made  
201 available. For the interpretation of our findings, we assumed for the Netherlands a prevalence of  
202 allergic rhinitis that is more or less similar to that in Western Europe, being around 23%, and  
203 frequently undiagnosed (Bauchau & Durham, 2004). Furthermore, it can be noted that the prevalence  
204 of allergic diseases in general in the Netherlands is around 52% (Van de Ven et al, 2006).

205 Datasets were complete, except that three weekly pollen concentration measurements were missing  
206 (1.3%). This was due to a malfunctioning monitoring station during week 26 of 2016, week 21 of 2017  
207 and week 22 of 2019. These missing measurements appeared to be completely random. We imputed  
208 missing values to avoid bias and maintain power. We used a four-week surrounding average to  
209 estimate the three missing data points and thus avoid breaking lines in visuals. We checked that the  
210 missing data has no material impact on the results by comparing these averages with the data of  
211 previous years for similar periods, and by observing whether removal from statistical tests had any  
212 effect on outcomes and conclusions.

213 Regarding the incidence of flu-like symptoms, we calculated the weekly change compared to the  
214 previous week ( $\Delta ILI = ILI_t - ILI_{t-1}$ ). This was to obtain an indication of the flu-like epidemic life cycle  
215 progression, whereby a decline is interpreted as  $R_0 < 1$  and an increase as  $R_0 > 1$  ( $R_0$  is the reproduction  
216 number of flu-like viruses). Furthermore, to cater, in one time-series metric, for changes in flu-like

217 incidence as well as for an incubation period of up to two weeks, we calculated a three-week moving  
218 average (3WMA) of changes in flu-like incidence, of which two weeks are forward looking:

219 
$$(\Delta ILI_{3WMA} = (\Delta ILI_t + \Delta ILI_{t+1} + \Delta ILI_{t+2})/3)$$

220 It should be noted that whenever we use the term incubation time, we also mean to include reporting  
221 delay (estimated to be around 4.5 days). We have not assumed delay effects for meteorological  
222 variables or pollen concentrations, so we have not calculated moving averages for other time series.

223 Compared with our previous study (Hoogveen, 2020), there is an overlap in datasets of less than  
224 10%. The datasets are extended by the extension in time, the addition of meteorological datasets and  
225 non-allergenic pollen, and the introduction of newly calculated variables, such as total pollen  
226 concentration,  $\Delta ILI_{3WMA}$ , the compound predictor and the log10 transformations on pollen, ILI and the  
227 hay fever index.

228 We formulated the following statistical null hypotheses for falsification.

229 H1<sub>0</sub>: there are no inverse correlations for total pollen concentrations with flu-like incidence (corrected  
230 for incubation period).

231 H2<sub>0</sub>: there are no inverse correlations between pollen and *changes* in flu-like incidence ( $\Delta ILI$  or  
232 corrected for incubation time:  $\Delta ILI_{3WMA}$ ).

233 H3<sub>0</sub>: there is no predictive significance of a discrete model's compound value, based on thresholds for  
234 pollen and meteorological co-inhibitors, related to changes in flu-like incidence ( $\Delta ILI_{3WMA}$ ).

235 To understand the role of meteorological variables, to check whether – in our datasets –  
236 meteorological variables show their well-established effects on pollen as assumed, and to select co-  
237 inhibitors:

238 H4<sub>0</sub>: meteorological variables – solar radiation, temperature and relative humidity – have no effect on  
239 pollen and/or flu-like incidence change ( $\Delta ILI_{3WMA}$ ).

240 Low-level allergenic pollen is sometimes known to have a slight allergenic effect. To understand how  
241 to interpret adding none-to-low-level allergenic pollen to the total pollen metric, we wanted to verify  
242 their effects on the hay fever index:

243 H5<sub>0</sub>: low-level allergenic pollen has no effect on hay fever and (changes in) flu-like incidence.

244 Note that with the exception of H5, all hypotheses are related to potential causality: the temporal  
245 sequentiality (temporality) of the respective independent variables, and flu-like incidence corrected for  
246 incubation period. Whenever we refer to temporality, we mean to indicate that the datasets behave *as*  
247 *if* there is causality, on the understanding that statistics alone cannot prove causality in uncontrolled  
248 settings.

249

#### 250 *Statistical analyses*

251 Variables are presented with their means (M) and standard deviations (SD).

252 We calculated correlation coefficients to test the hypotheses and to assess the strength and direction of  
253 relationships. As a sensitivity analysis, we also calculated the bootstrapped correlation coefficients.

254 We used the full datasets, to avoid sub-seasonal bias, and by extending the number of years the  
255 distortions by incidental and uncontrolled events are supposed to be minimized. However, as a second  
256 sensitivity analysis, we removed from the datasets the autumn weeks between 42 and 50, which  
257 typically show low pollen concentrations of up to 20 grains/m<sup>3</sup>, which are applied to analyze the main  
258 outcome (H2<sub>0</sub>).

259 Next, linear regression (F-test) on identified inhibitors and interactions was used *descriptively* to  
260 determine whether the relationship can (statistically) be described as linear, and to determine the  
261 equation using estimates and intercept values, and produce probability, significance level, F-value, and  
262 the Multiple R squared correlation to understand the predictive power of the respective inhibitor.

263 Standard deviations and errors, and degrees of freedom (DF) were used as input for calculating the  
264 95% probability interval. We have reported in the text the outcome of statistical tests in APA style,  
265 adapted to journal requirements. For relationships that appear non-linear – logarithmic or exponential

266 – we have used the log10 function to transform the data if that makes the relationship appear linear,  
267 before re-applying linear regression. We have also used the log10 transformed datasets for the  
268 calculation of correlation coefficients, to correct for skewness.

269

270 Finally, we created a simple, discrete model resulting in one compound value, using selected flu-like  
271 inhibitors. This was to determine the optimal average threshold values for these inhibitors, which have  
272 the highest joint correlation with changes in flu-like incidence ( $ILI_{3WMA}$ ). We applied linear regression  
273 (F-test) to understand the predictive power of the compound value, and to determine the linear  
274 equation when significant. By constructing one compound, independent variable, we covered for  
275 collinearity or interaction effects between joined co-inhibitors. In our analysis, we based the  
276 compound value on three selected thresholds. For example, when one threshold value is passed, this  
277 leads to a compound value = 1, and when all three threshold values are passed, this leads to a  
278 compound value = 3. Therefore, the compound values are in the range of [0, 3].

279 The compound value equation can be expressed as shown below, where  $iv$  = the respective  
280 independent variable that acts as inhibitor of flu-like incidence, and  $k$  relates to the respective  
281 calculated threshold value. For each respective threshold passed ( $iv > k$ ), +1 is added to the compound  
282 value (CV):

283 
$$CV = \sum_{n=1}^3 (iv_n > k_n) \rightarrow 1 \wedge (iv_n \leq k_n) \rightarrow 0$$

284 For the three selected co-inhibitors, this takes in Excel the form of  $CV = IF(IV_1 > K_1; 1; 0) +$   
285  $IF(IV_2 > K_2; 1; 0) + IF(IV_3 > K_3; 1; 0)$ , whereby we have used a threshold value for solar radiation ( $k_r$ ), and  
286 both pollen threshold values for allergenic ( $k_{ap}$ ) and total pollen ( $k_p$ ) for  $K_1$ ,  $K_2$  and  $K_3$  respectively, as  
287 is shown in section 3.

288 It is outside of the scope of this research to verify the underlying datasets of Elkerliek Ziekenhuis,  
289 RIVM/Nivel, CBS, and KNMI by examining the validity and reliability of their data collection  
290 methods. These institutes have well-established and internationally standardized protocols for data  
291 collection and verification.

292 All regression analyses have been carried out using the statistical package R version 3.5.

293

294 **3. Results**

295 The means and standard deviations per variable are given in Table 1. For the correlation coefficients

296 below, we have used the log10 transformed data for respective variables, to correct for skewness.

| Variable                                                       | Mean  | SD   | Log10 transformed |      |
|----------------------------------------------------------------|-------|------|-------------------|------|
|                                                                |       |      | Mean              | SD   |
| Allergenic pollen concentration in grains/m3                   | 349   | 987  | 1.84              | 0.86 |
| Total pollen concentration in grains/m3                        | 732   | 1368 | 2.17              | 0.98 |
| Total pollen concentration in grains/m3 (minus weeks 42 to 50) | 870   | 1452 | 2.45              | 0.76 |
| Low-level allergenic pollen concentration in grains/m3         | 383   | 626  | 1.85              | 1.03 |
| Flu-like incidence (ILI) per 100K citizens                     | 47    | 40.2 | 1.54              | 0.35 |
| $\Delta$ ILI                                                   | -0.25 | 15.4 |                   |      |
| $\Delta$ ILI <sub>3WMA</sub>                                   | -0.26 | 8.9  |                   |      |
| $\Delta$ ILI <sub>3WMA</sub> (minus weeks 42 to 50)            | -0.89 | 9.3  |                   |      |
| Index hay fever                                                | 101   | 116  | 1.81              | 0.39 |
| Relative humidity (%)                                          | 79    | 8.27 |                   |      |
| Temperature in °C                                              | 10.8  | 5.82 |                   |      |
| Solar radiation in J/cm2                                       | 1047  | 709  |                   |      |
| Compound Model in thresholds passed                            | 1.4   | 1.10 |                   |      |

297

298 *Table 1: Overview of means (M) and standard deviations (SD) per variable in the dataset, including*

299 *Log10 transformed data, and datasets that are reduced for sensitivity analysis.*

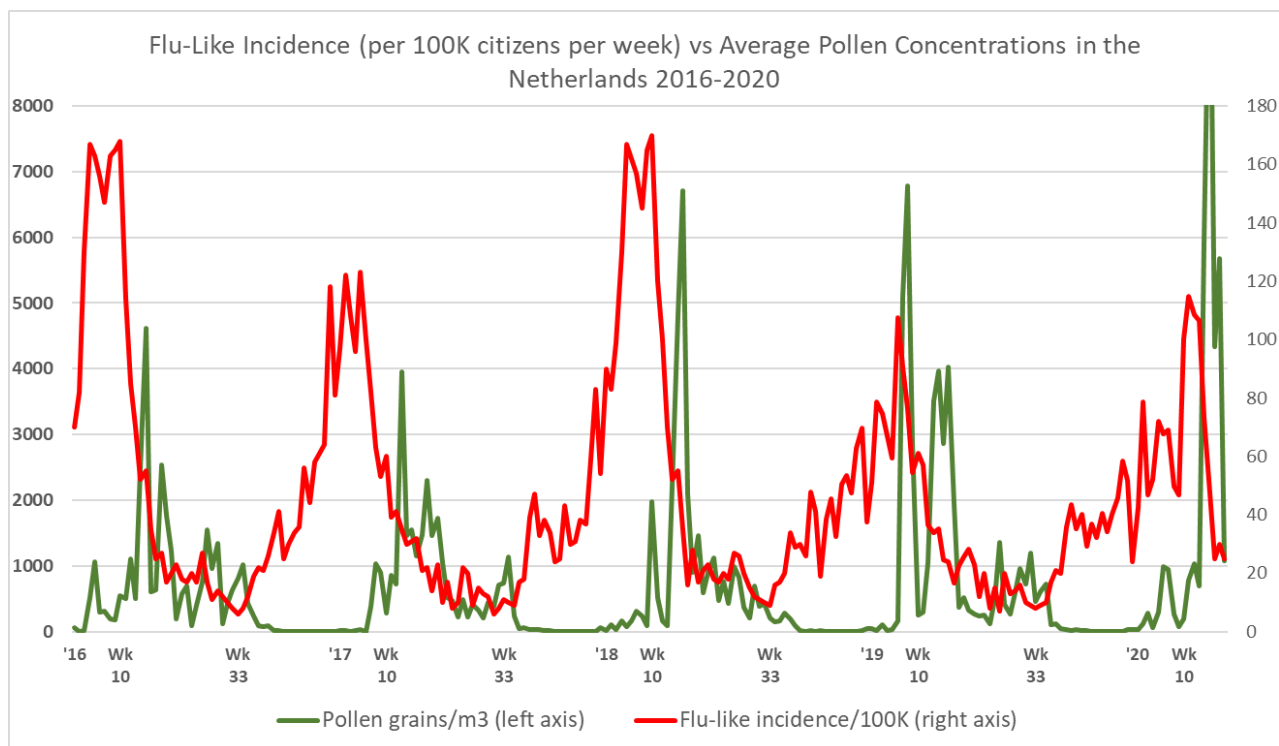

300

301 *Figure 3: Total pollen concentrations vs. flu-like incidence in the Netherlands, whereby especially*  
302 *passing the 610 total pollen grains/m<sup>3</sup> threshold marks the seasonal switches around week 10 ( $\pm 5$*   
303 *weeks) and week 33 ( $\pm 2$  weeks). For the interpretation of the relationship, an incubation time of up to*  
304 *2 weeks should be taken into account, and the change in flu-like incidence ( $R_o > 1$  or  $R_o < 1$ ) should be*  
305 *considered.*

306

307 When further inspecting the datasets regarding pollen concentrations and flu-like incidence reported  
308 by primary medical care in the Netherlands, it was clear that there are continuous pollen bursts (Figure  
309 3), whereby only a few of these pollen bursts are classified as more allergenic (Figure 6). These pollen  
310 bursts, allergenic or low-level allergenic, typically coincide with and precede a decline in flu-like  
311 incidence.

312 The correlation for total pollen and flu-like incidence is highly significant when taking into account  
313 incubation time:  $r(222) = -0.40$ ,  $p < 0.001$ . We can thus reject the null-hypotheses  $H_{10}$  in favor of the  
314 alternative hypothesis that, when taking into account incubation time, there is a negative correlation  
315 between total pollen and flu-like incidence, including the first cycle of the COVID-19 pandemic.

316 Furthermore, we can reject  $H_{5_0}$  in favor of our assumption that it makes sense to also include low-level  
317 allergenic pollen concentrations in our study. Low-level allergenic pollen is inversely correlated to flu-  
318 like incidence ( $r(221) = -0.37, p < .00001$ ), especially when corrected for the 2 weeks incubation time  
319 ( $r(219) = -0.53, p < .00001$ ).

320 The fact that the correlations become stronger when taking into account incubation time, implies  
321 temporality. Furthermore, we can also observe from Figure 3 that flu-like incidence starts to decline  
322 *after* the first pollen bursts. Moreover, flu-like incidence starts to increase sharply *after* pollen  
323 concentrations become very low or close to zero. This is a qualitative indication of temporality.  
324 Furthermore, we can notice that the first COVID-19 cycle behaved according to pollen-flu seasonality,  
325 at least does not break with it.

326 When testing the impact on  $\Delta ILI$ , the weekly *changes* in medical flu-like incidence, the extended  
327 dataset till 2020, including COVID-19, shows a strong and highly significant inverse correlation with  
328 total pollen ( $r(222) = -0.26, p = 0.000089$ ). Therefore, we can falsify the null-hypothesis ( $H_{2_0}$ ) that  
329 there is no inverse correlation between the weekly pollen concentrations and weekly changes in flu-  
330 like incidence ( $\Delta ILI$ ), including the period covering the first cycle of the COVID-19 pandemic. This  
331 inverse correlation therefore provides further support for the alternative hypothesis that the presence of  
332 an elevated level of pollen has an inhibiting effect on flu-like incidence, and starts to immediately  
333 influence the direction and course of the epidemic life cycle. Also, during the COVID-19 dominated  
334 period of the last 9 weeks, it appears that flu-like incidence behaves according to the expected pollen-  
335 flu seasonality. This strengthens the idea that COVID-19 might itself be seasonal, like all other flu-like  
336 pandemics since the end of the 19<sup>th</sup> century. Also when studying other data from RIVM.nl about  
337 COVID-19 hospitalizations, we cannot conclude that COVID-19 breaks through the seasonal barrier.  
338 For example, new COVID-19 hospitalizations decreased from a peak of 611 on March 27 to just 33 on  
339 May 3, the last day of week 18.



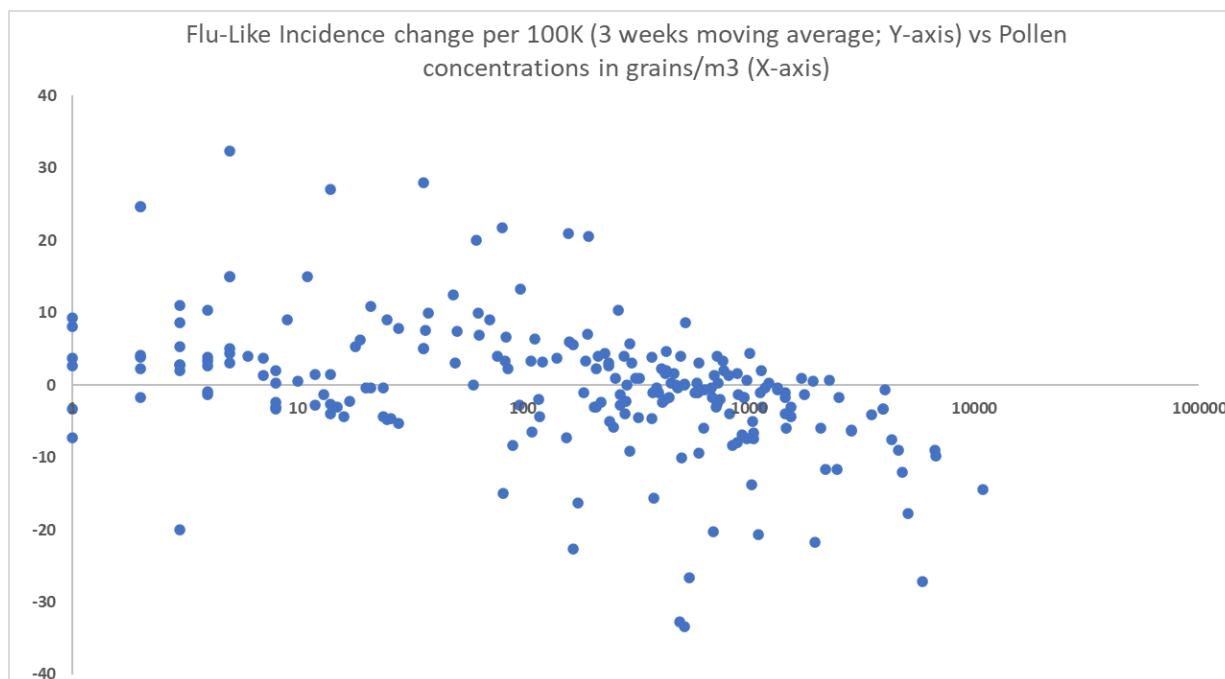

340

341 *Figure 4: Scatter diagram showing the inverse relationship between changes in flu-like incidence*  
342 *( $\Delta ILI_{3WMA}$ ) and  $\log_{10}$ (pollen concentrations in grains/m<sup>3</sup>).*

343 Using the three-week moving average ( $\Delta ILI_{3WMA}$ ) of changes in flu-like incidence, the correlation  
344 coefficients become stronger and are again highly significant for total pollen concentration ( $r(223) = -$   
345  $0.41$ ,  $p < 0.00001$ ). The bootstrapped correlation coefficient calculation gives a comparable outcome  
346 ( $r(223) = -0.38$ ,  $p < 0.0001$ ). As a second sensitivity analysis, we used the reduced dataset (minus the  
347 weeks of low pollen activity) and again found similar correlations ( $r(191) = -0.44$ ,  $p < 0.0001$ ;  
348 bootstrapped  $r(188) = -0.44$ ,  $p < 0.0001$ , CI 95%  $-0.46$  to  $-0.25$ ). We can thus also reject the null-  
349 hypothesis ( $H_{20}$ ) that there is no inverse relationship between pollen and  $\Delta ILI_{3WMA}$ , the three-week  
350 moving average of changes in flu-like incidence including incubation time. As this correlation (see  
351 also Figure 4) is stronger than it would be if it were not corrected for the incubation period, it is a  
352 further indication of temporality. And given that it is even stronger when the 2019/2020 flu-like  
353 season is included, it also does not contradict the idea that COVID-19 is subject to pollen induced flu-  
354 seasonality.

355 Linear regression analysis shows that pollen has a highly significant inhibitory effect on flu-like  
356 incidence change ( $\Delta ILI_{3WMA}$ ) of  $F(1, 222) = 37.1$ ,  $p < 0.001$  (see Table 2, line 1), as a further basis for

357 using total pollen concentration as a predictor. A Log10 transformation of pollen to compensate for  
 358 visual non-linearity leads to a similar outcome:  $F(1, 219) = 43.87$ ,  $p < 0.001$  (see Table 2, line 4). At  
 359 least visually, it is a good fit (see Figure 4).

| $\Delta$ Flu-change ( $\Delta ILL_{3WMA}$ )          | Estimate | 95%CI            | Intercept | Multiple R sq. | F-stat on DF   | P<    |
|------------------------------------------------------|----------|------------------|-----------|----------------|----------------|-------|
| 1. Total pollen per 100/m <sup>3</sup> incr.         | -0.253   | -0.334 to -0.171 | 1.53      | 0.14           | 37.1 (1, 222)  | 0.001 |
| 2. Solar radiation per 100 J/cm <sup>2</sup> incr.   | -0.312   | -0.475 to -0.153 | 2.98      | 0.06           | 14.43 (1, 222) | 0.001 |
| 3. Compound predictor per incr. of 1                 | -3.88    | -4.82 to -2.94   | 4.95      | 0.23           | 65.59 (1, 222) | 0.001 |
| 4. Log10 (Total pollen grains/m <sup>3</sup> ) incr. | -3.73    | -4.84 to -2.63   | 7.71      | 0.17           | 43.87 (1, 219) | 0.001 |

360  
 361 *Table 2: Summary of univariate regression analyses of pollen (1), solar radiation (2) and our*  
 362 *compound pollen/solar radiation predictor (3) on changes in flu-like incidence ( $\Delta ILL_{3WMA}$ ). This shows*  
 363 *all highly significant ( $p < 0.001$ ) results, but the correlation for solar radiation is weak (0.06) and the*  
 364 *compound predictor is the strongest (0.23). The log10 (4) analysis is a check on the non-linearity of*  
 365 *pollen concentrations in relation to  $\Delta ILL_{3WMA}$ , leading to the same conclusion.*

366

| Flu-like incidence per 100K p.w. | Estimate | 95%CI             | Intercept | Multiple R sq. | F-stat on DF   | P<    |
|----------------------------------|----------|-------------------|-----------|----------------|----------------|-------|
| Hay fever index per 1% incr.     | -0.12677 | -0.181 to -0.0723 | 63.81     | 0.11           | 20.74 (1, 164) | 0.001 |

| $\Delta$ Hay Fever Index (2016=100)       | Estimate | 95%CI          | Intercept | Multiple R sq. | F-stat on DF   | P<    |
|-------------------------------------------|----------|----------------|-----------|----------------|----------------|-------|
| Total pollen per 100/m <sup>3</sup> incr. | 5.3049   | 3.922 to 6.688 | 67.78     | 0.26           | 56.52 (1, 164) | 0.001 |

| Log10 (Flu-like incidence per 100K) | Estimate | 95%CI            | Intercept | Multiple R sq. | F-stat on DF   | P<    |
|-------------------------------------|----------|------------------|-----------|----------------|----------------|-------|
| Log10(hay fever index)              | -0.444   | -0.573 to -0.316 | 2.360     | 0.22           | 45.96 (1, 164) | 0.001 |

367  
 368 *Table 3: Summary of univariate regression analyses of total pollen concentration on hay fever ( $p <$*   
 369 *0.001) and hay fever on flu-like incidence/100K citizens per week ( $p < 0.001$ ), whereby pollen leads to*  
 370 *an increase in hay fever, which in turn is associated with a decrease in flu-like incidence. To*  
 371 *compensate for non-linearity, the regression of log10(hay fever) on log10(flu-like incidence) is added,*  
 372 *with a similar, highly significant outcome.*

373 In line with the correlation between pollen and flu-like incidence, the correlation between *total* pollen  
374 concentration and hay fever is stronger ( $r(162)= 0.76, p < 0.00001$ ) than it is for allergenic and low-  
375 level allergenic pollen individually. This confirms that we can best use total pollen concentration as a  
376 predictor. Univariate regression analyses show that total pollen has a highly significant positive effect  
377 on hay fever incidence, which in turn has a highly significant inhibitory effect on flu-like incidence  
378 (see Table 3).

379 Low-level allergenic pollen also has a highly significant effect on hay fever:  $r(160)= 0.77, p <$   
380  $0.00001$ . We can thus reject the null-hypothesis  $H_{5_0}$  in favor of the alternative hypothesis that low-  
381 level allergenic pollen also has a positive effect on hay fever. This might imply that pollen classified  
382 as none-to-low-level allergenic might still be responsible for certain allergic effects, and not just the  
383 more allergenic pollen. Therefore, trying to use low-level allergenic pollen to discriminate effects  
384 outside the allergenic path regarding the immune system might be challenging.

385

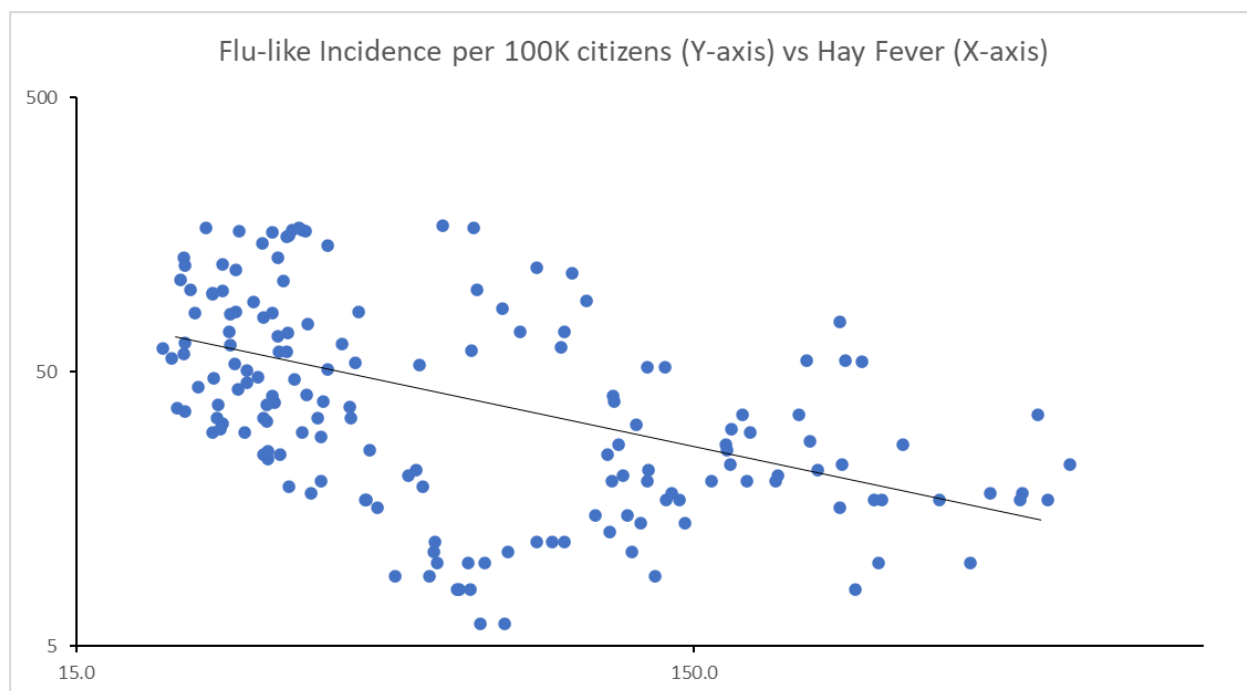

386

387 *Figure 5: Inverse correlation between hay fever and flu-like incidence.*

388 The nature of the relationship between hay fever and flu-like incidence might be statistically described  
389 as linear. However, it could be better described as logarithmic (Figure 5). In the context of this study,  
390 we have interpreted it as a further indication that it could also be described as a threshold-based  
391 switching pattern, conforming with the threshold-based approach that we have taken in our compound  
392 value, as calculated below.

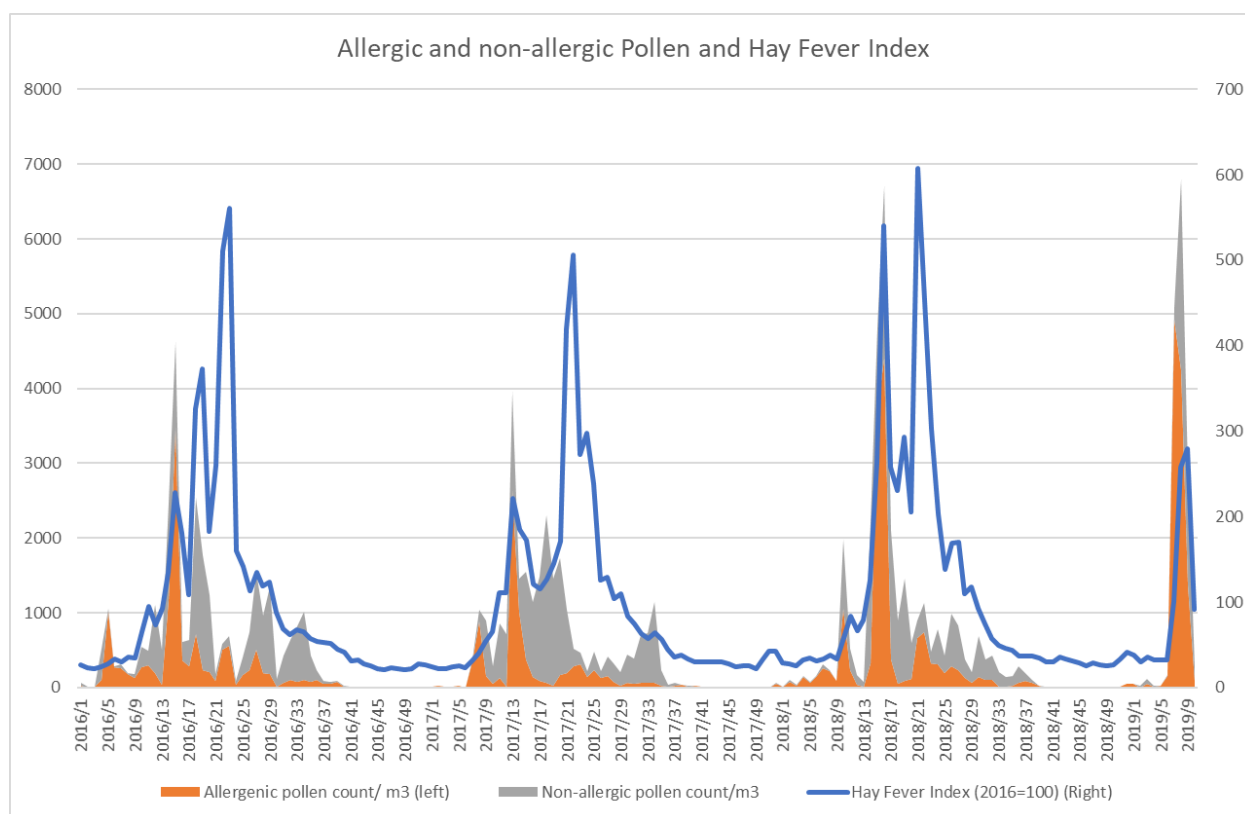

393  
394 *Figure 6: Both allergenic and low-level allergenic pollen are positively correlated to hay fever.*

395  
396 The expected effects of relative humidity ( $r(223) = -0.86, p < 0.0001$ ), temperature ( $r(223) = 0.41, p <$   
397  $0.0001$ ) and solar radiation ( $r(223) = 0.67, p < 0.0001$ ) on total pollen were found. So sunny, warmer  
398 and dry weather does indeed go hand-in-hand with an increase in pollen count. We can therefore reject  
399 the null-hypothesis that the selected meteorological variables ( $H_0$ ) have no effect on pollen, whereby  
400 relative humidity reduces the amount of aerosol pollen.

401 Counter to findings in other studies, relative humidity is positively associated with changes in flu-like  
402 incidence ( $\Delta ILI_{3WMA}$ ) in the Netherlands ( $r(224) = 0.34, p < 0.00001$ ). The Dutch flu season is cold

403 and humid, and on rainy days the effect of pollen and solar radiation are reduced. Although  
404 temperature strongly correlates with flu-like incidence ( $r(226) = -0.82$ ,  $p < 0.0001$ ), it has a negligible  
405 effect on  $\Delta ILI$ , weekly changes in flu-like incidence ( $r(224) = -0.02$  n.s.), also when corrected for  
406 incubation time. Therefore, it seems unlikely that temperature has a direct effect on aerosol flu-like  
407 viruses and the life cycle of a flu-like epidemic. In line with this, temperature is also not a good  
408 marker for the onset or the end of the flu season. In the Netherlands the end of the flu season ( $R_o < 1$ )  
409 can coincide with an average temperature that is close to  $0^\circ\text{C}$  and the start of the flu season ( $R_o > 1$ ) can  
410 coincide with temperatures as high as  $17^\circ\text{C}$ .

411 Of the meteorological variables, only solar radiation has a highly significant inverse correlation with  
412 *changes* in flu-like incidence ( $\Delta ILI_{3WMA}$ ): ( $r(224) = -0.25$ ,  $p = 0.000156$ ).

413 Thus, of the meteorological variables, when it comes to solar radiation and relative humidity the null-  
414 hypothesis ( $H_{40}$ ) can also be rejected, as they seem to effect the flu-like epidemic lifecycle. Of these  
415 two, only solar radiation is a flu-like inhibitor in line with its positive effect on pollen concentration,  
416 its association with immune-activation and the effect that UV has on viruses.

417 A univariate linear regression also shows the highly significant negative correlation for solar radiation  
418 on flu-like incidence change ( $\Delta ILI_{3WMA}$ ) ( $F(1, 222) = 14.43$ ,  $p < 0.001$  (see Table 2, line 2). As the  
419 correlation is weak (Multiple R-squared = .06), we have interpreted solar radiation as a co-inhibitor in  
420 relation to pollen; as a stand-alone independent variable its effect is too weak to explain flu-like  
421 seasonality.

422 Taking into account all these findings, we developed a discrete, compound model in which we  
423 included the changes in flu-like incidence ( $\Delta ILI_{3WMA}$ ), a threshold value for solar radiation ( $k_r$ ), and  
424 both pollen threshold values for allergenic ( $k_{ap}$ ) and total pollen ( $k_p$ ). We found that the compound  
425 model has the highest inverse correlation ( $r(222) = -0.48$ ,  $p < 0.001$ ) for the following threshold  
426 values:  $k_r$ :  $510 \text{ J/cm}^2$ ,  $k_{ap}$ :  $120 \text{ allergenic pollen grains/m}^3$ , and  $k_p$ :  $610 \text{ total pollen grains/m}^3$ . The  
427 bootstrapped correlation coefficient calculation gives a comparable outcome ( $r(222) = -0.47$ ,  $p <$   
428  $0.0001$ ). In line with the previous outcomes, the inclusion of relative humidity, low-level allergenic

429 pollen or temperature did not improve the correlation strength of this model. Furthermore, given that  
430 they showed no significant interaction effects with pollen, it was not necessary to take such  
431 interactions into consideration in the model.

432 In each of the observed years, the now (re)defined pollen thresholds are passed in week 10 ( $\pm 5$   
433 weeks), depending on meteorological conditions controlling the pollen calendar and coinciding with  
434 reaching flu-like peaks, and again in week 33 ( $\pm 2$  weeks), marking the start of the new flu-like season.

435 There is a highly significant inverse relationship between our compound threshold-based predictor  
436 value with flu-like incidence change ( $\Delta ILI_{3WMA}$ ) of  $F(1, 222) = 65.59$ ,  $p < 0.001$  and a Multiple R-  
437 squared correlation of 0.2281 (see Table 2, line 3). This confirms the usefulness of a discrete, pollen  
438 and solar radiation threshold-based model as a predictor of switches in flu-like seasonality, whereby  
439 the effect of pollen is stronger than that of solar radiation. As a consequence, we can reject the null-  
440 hypothesis ( $H_{30}$ ) that this compound pollen/solar radiation value has no predictive significance for flu-  
441 like seasonality.

442

#### 443 **4. Discussion**

444 First of all we will discuss the possible implications of the results for our theoretic model and  
445 alternative explanations. Next, we will discuss our methods.

##### 446 *Theoretic model*

447 We found highly significant inverse relationships between pollen and solar radiation and (changes in)  
448 flu-like incidence: a higher pollen concentration or an increase in solar radiation is related to a decline  
449 in flu-like incidence. This inverse correlation with pollen becomes stronger when the 2019/2020  
450 period is included, which has been increasingly dominated by COVID-19 during the last 9 weeks.

451 Given that more time will be needed to draw conclusions about whether COVID-19 is seasonal or not,  
452 from the data in this study it can only be observed that COVID-19 is not breaking with the flu-like  
453 seasonality pattern. Alternatively, social distancing may have contributed to flattening both the flu-like

454 epidemic and COVID-19 pandemic curves at the tail-end of the 2019/2020 flu-like season. The Dutch  
455 government imposed hygiene measures from March 9, 2020 onwards and a mild form of a lockdown,  
456 that included social distancing, from March 11. Such behavioral policies will need to be included in  
457 the theoretic model, in addition to pollen and meteorological variables, if we want to be able to  
458 understand the relative importance of social distancing versus seasonality. We could, for example,  
459 more explicitly include behavioral variables (Gozzi et al, 2020) in the compound model, by rating  
460 lockdown regimes on a Likert-type scale [1, 5], from no lockdown (1) to a complete lockdown (5).  
461 Although seasonal behavior might be implicitly covered by the meteorological variables, it could still  
462 make sense to model them more explicitly as there might be cultural patterns in play – such as  
463 holidays or seasonal celebrations – that need to be taken into account.

464

465 The highly significant inverse correlation between hay fever and flu-like incidence confirms that  
466 allergic rhinitis makes it more difficult for flu-like viruses to propagate.

467 Solar radiation, the only meteorological variable that has a co-inhibitive effect on changes in flu-like  
468 incidence, has a stimulating effect on aerosol pollen formation and is responsible for melatonin-  
469 induced immuno-activation. Relative humidity reduces pollen aerosol formation, and correlates  
470 positively with flu-like incidence. We did not specifically look at precipitation, but it might make  
471 sense to explicitly consider this independent variable, given that it reduces pollen dissemination.

472 In our study we showed that temperature, aside from the fact that it influences pollen, has no  
473 predictive value for changes in flu-like incidence. Therefore, its inverse correlation with flu-like  
474 incidence might be interpreted in a number of ways: a) as spurious: the common causal factor is solar  
475 radiation, or b) as a stressor that has immediate effects on the functioning of the immune system of  
476 already infected persons. When discussing the influence of meteorological variables, we assume that  
477 the associated behavioral aspects are covered. These are sometimes summarized as seasonal behavior,  
478 but this independent variable might have a cultural dimension that needs to be better understood.



479 We showed that a compound value, based on threshold values for pollen and solar radiation, results in  
480 a stronger correlation with the flu-like lifecycle than the individual inhibitors. This model could form  
481 an empirical basis for understanding flu-like seasonality, its  $R_0$  and reliably predicting the start and  
482 end of each flu-like cycle. Given that behavior, in the form of hygiene and social distancing, is also  
483 widely seen as an inhibitor, it might be worthwhile to also include this factor in our compound value.  
484 This will probably lead to an even stronger predictor for the evolution of the reproduction number  $R_0$   
485 of flu-like epidemics, although this might be beyond explaining the seasonality effect itself.

486 For as long as the level of herd immunity (Fine et al., 2011) for COVID-19 is still below required  
487 thresholds for ending pandemics (Plans-Rubio, 2012), it might make sense to also include indications  
488 of herd immunity levels in the theoretic model.

489 Finally, despite pollution not been seen as an inhibitor of flu-like incidence (Coccia, 2020), it still  
490 might interact with pollen. A more complete theoretic model, controlling for the (interactions with)  
491 pollution, could give more insight in how to interpret the findings of this or similar studies.

492

#### 493 *Methodological considerations*

494 In general, statistical research cannot prove causal relationships in uncontrolled environments, even if  
495 datasets seem to behave *as if* there is causality. Such statistics, however, can provide indications and  
496 identify reliable predictors, help filter out bad ideas, and be the inspiration for testable hypotheses that  
497 can be verified in laboratory and other fully controlled experiments.

498 Although the datasets seem to be sufficiently representative, there appears to be room for  
499 improvement. For example, including the data of more weather stations might help to improve the  
500 approximation of the weather conditions the Dutch population experiences on average, and help to  
501 distinguish patterns per province. Furthermore, it might be useful to include wind speeds, given that  
502 these constitute a vector for the dispersal of pollen in the Netherlands, which has a maritime and  
503 temperate climate. Additionally, the effects of climate change on pollen maturation (Frei & Gassner,  
504 2008) might also be an important factor. Another example of improving the representativeness would

505 be by including more pollen types in the particle counts than are currently covered by the current  
506 methodology of the European Allergy Network.

507 Specifically, the validity and reliability of the hay fever index is unclear, and the dataset is not  
508 maintained. There might be lag effects, but these are unknown. It might also be a good idea to include  
509 alternative datasets, such as search-engine based trend analysis to be able to generate a complete  
510 dataset for a whole period of study. These could be validated separately. Alternatively, representative  
511 medical datasets could be obtained.

512 Finally, the ILI dataset, which is now based on a sample of 40 representative local primary care units,  
513 could be improved. For example, including *all* patients visiting *any* primary care unit in the  
514 Netherlands would reduce the need for extrapolation, with its inherent risk of bias. The use of  $\Delta$   
515  $ILI_{3WMA}$  including incubation time, seems to be a more elegant option than carrying out multiple tests  
516 with  $\Delta ILI$ . At the same time, it could be argued that this metric might be better as a two-week forward-  
517 looking moving average. This is because it is unlikely that any effects will be noticed in the first week,  
518 given the average reporting delays and incubation period.

519

## 520 **5. Conclusion**

521 We conclude that pollen and solar radiation both have highly significant inverse correlations with  
522 changes in flu-like incidence. Furthermore, the inverse correlation between pollen and (changes in)  
523 flu-like incidence becomes stronger when the incubation time is included. A compound variable –  
524 based on the thresholds for total pollen, allergenic pollen and solar radiation – shows the strongest  
525 correlation with changes in flu-like incidence, and appears to be useful as a predictor for switches in  
526 flu-like seasonality.

527 COVID-19 has dominated the tail-end of the 2019-2020 flu-like season in the Netherlands. And,  
528 although COVID-19 *appears* to be also subject to flu-like seasonality, like pandemics that preceded it,  
529 it is still too early to draw conclusions about this.

530 It will require further research to test the findings, threshold values and predictive model for flu-like  
531 seasonality in other countries with different climates. Controlled experiments are needed to deepen the  
532 biomedical understanding of how allergic rhinitis and immuno-activation by pollen protects against  
533 the spread of flu-like viruses, and to confirm and understand the assumed interaction between pollen  
534 and viral bio-aerosol.

535

536 **Acknowledgements:** thanks to Sowjanya Putrevu, data scientist at Icecat, for her voluntary support  
537 within executing statistical tests.

538

### 539 **Literature**

540 Abhimanyu O.P. & Coussens A.K. (2017). The role of UV radiation and vitamin D in the seasonality  
541 and outcomes of infectious disease. *Photochemical & Photobiological Studies*, issue 3.

542 Ahmadi M., Sharifi A., Dorosti S., Ghouschi S.J., & Ghanbari N. Investigation of effective  
543 climatology parameters on COVID-19 outbreak in Iran. *Science of The Total Environment*

544 Volume 729, 10 August 2020, 138705. <https://doi.org/10.1016/j.scitotenv.2020.138705>

545 Bauchau V. & Durham S.R. (2004). Prevalence and rate of diagnosis of allergic rhinitis in Europe.

546 *European Respiratory Journal*, 24: 758-764; DOI: 10.1183/09031936.04.00013904

547 Brandelius A., Andersson M. & Uller L. (2020). Topical dsRNA challenges may induce

548 overexpression of airway antiviral cytokines in symptomatic allergic disease. A pilot in vivo study in  
549 nasal airways. *Respiratory Medicine*, vol 108(12) 1816-1819

550 <https://doi.org/10.1016/j.rmed.2014.10.010>

551 Carli, G., Cecchi, L., Stebbing, J., Parronchi, P., & Farsi, A. (2020). Is asthma protective against

552 COVID-19? *Allergy*, <https://doi.org/10.1111/all.14426>

553 Chong K.C., Liang J., Jia K.M., Kobayashi N., Wang M.W., Wei L., Lau S.Y.F., & Sumi A. Latitudes  
554 mediate the association between influenza activity and meteorological factors: A nationwide  
555 modelling analysis in 45 Japanese prefectures from 2000 to 2018. *Science of the Total Environment*.  
556 Vol 703, February 2020. <https://doi.org/10.1016/j.scitotenv.2019.134727>

557 Coccia M. (2020). Diffusion of COVID-19 outbreaks: the interaction between air pollution-to-human  
558 and human-to-human transmission dynamics in hinterland regions with cold weather and low average  
559 wind speed. Working Paper CocciaLab n. 48/2020, CNR - National Research Council of Italy.

560 De Weger L.A. et al. (2013). Impact of Pollen. In: Sofiev M., Bergmann KC. (eds) *Allergenic Pollen*.  
561 Springer, Dordrecht.

562 Dong, X, Cao, Y-Y, Lu, X-X, et al. Eleven faces of coronavirus disease 2019. *Allergy*. 2020; 75:  
563 1699–1709. <https://doi.org/10.1111/all.14289>

564 Fine P., Eames K. & Heymann D.L., “Herd Immunity”: A Rough Guide, *Clinical Infectious Diseases*,  
565 Vol 52(7), April 2011, 911–916, <https://doi.org/10.1093/cid/cir007>.

566 Fox S.J., Miller J.C., & Meyers L.A. (2017). Seasonality in risk of pandemic influenza emergence.  
567 *PLoS Comput Biol*. Oct; 13(10): e1005749. doi: 10.1371/journal.pcbi.1005749

568 Gozzi N., Perrotta D., Paolotti D., and Perra N. (2020). Towards a data-driven characterization of  
569 behavioral changes induced by the seasonal flu. Cornell University. arXiv:2002.00671 [physics.soc-  
570 ph].

571 Guarnieri, M., Speranza, A., Nepi, M. et al. (2006). Ripe pollen carbohydrate changes in *Trachycarpus*  
572 *fortunei*: the effect of relative humidity. *Sex Plant Reprod* 19, 117. [https://doi.org/10.1007/s00497-](https://doi.org/10.1007/s00497-006-0027-3)  
573 [006-0027-3](https://doi.org/10.1007/s00497-006-0027-3)

574 Frei, T. & Gassner, E. Climate change and its impact on birch pollen quantities and the start of the  
575 pollen season an example from Switzerland for the period 1969–2006. *Int J Biometeorol* 52, 667  
576 (2008). <https://doi.org/10.1007/s00484-008-0159-2>

577 Gilles, S, Blume, C, Wimmer, M, et al. Pollen exposure weakens innate defense against respiratory  
578 viruses. *Allergy*. 2019; 75: 576– 587. <https://doi.org/10.1111/all.14047>

579 Hoogeveen M.J. (2020). Pollen likely seasonal factor in inhibiting flu-like epidemics. A Dutch study  
580 into the inverse relation between pollen counts, hay fever and flu-like incidence 2016–2019, *Science*  
581 of The Total Environment, Vol. 727, 2020, <https://doi.org/10.1016/j.scitotenv.2020.138543>.

582 Howarth, P.H. (2000). Allergic rhinitis: not purely a histamine-related disease. *European Journal of*  
583 *Allergy and Clinical Immunology*, Vol 55(s64), 7-16.

584 Jackson D.J., Busse W.W., Bacharier L.B., et al. Association of respiratory allergy, asthma, and  
585 expression of the SARS-CoV-2 receptor, ACE2. *J Allergy Clin Immunol* 2020;  
586 <https://doi.org/10.1016/j.jaci.2020.04.009>

587 Klemens, C., Rasp, G., Jund, F., Hilgert, E., Devens, C., Pfrogner, E., Kramer, M.F. Mediators and  
588 cytokines in allergic and viral-triggered rhinitis. *Allergy & Asthma Proceedings* . Jul/Aug 2007, Vol  
589 28(4), 434-441.

590 Kissler S.M., Tedijanto C., Goldstein E., Grad Y.H. & Lipsitch M. (2020). Projecting the transmission  
591 dynamics of SARS-CoV-2 through the post-pandemic period. *Science* 10.1126/science.abb5793.

592 Licari, A., Votto, M., Brambilla, I., Castagnoli, R., Piccotti, E., Olcese, R., Tosca, M.A., Ciprandi, G.  
593 and Marseglia, G.L. (2020), Allergy and asthma in children and adolescents during the COVID  
594 outbreak: What we know and how we could prevent allergy and asthma flares. *Allergy*.  
595 doi:10.1111/all.14369

596 Lindsley A.W., Schwartz J.T., Rothenberg M.E.. Eosinophil responses during COVID-19 infections  
597 and coronavirus vaccination. *J Allergy Clin Immunol*. 2020; <https://doi.org/10.1016/j.jaci.2020.04.021>

598 Liu Y., Gayle A.A., Wilder-Smith A., Rocklöv J. The reproductive number of COVID-19 is higher  
599 compared to SARS coronavirus, *Journal of Travel Medicine*, Vol 27(2), March 2020,  
600 <https://doi.org/10.1093/jtm/taaa021>.

601 Ma Y., Zhao Y., Liu J., He X., Wang B., Fu S., Yan J., Niu J., Zhou J. & Luo B. Effects of  
602 temperature variation and humidity on the death of COVID-19 in Wuhan, China. *Science of The Total*  
603 *Environment* Volume 724, 1 July 2020, 138226. <https://doi.org/10.1016/j.scitotenv.2020.138226>

604 Marín-Hernández, D., Schwartz, R.E. and Nixon, D.F. (2020), Epidemiological evidence for  
605 association between higher influenza vaccine uptake in the elderly and lower COVID-19 deaths in  
606 Italy. *J Med Virol*. doi:10.1002/jmv.26120

607 Moriyama M., Hugentobler W.J. & Iwasaki A.. Seasonality of Respiratory Viral Infections. *Annual*  
608 *Review of Virology* 2020 7:1. <https://doi.org/10.1146/annurev-virology-012420-022445>.

609 Nivel.nl (2020). Nivel zorgregistraties eerste lijn – Surveillance – wekelijks bulletin over symptomen  
610 en aandoeningen op basis van gegevens van huisartsen, version June 17, 2020.  
611 [https://www.nivel.nl/sites/default/files/algemene-content/NivelSurveillance\\_2020\\_wk24b.pdf](https://www.nivel.nl/sites/default/files/algemene-content/NivelSurveillance_2020_wk24b.pdf)

612 Nosal C., Ehlers A. & Haspel J.A.. Why Lungs Keep Time: Circadian Rhythms and Lung Immunity.  
613 *Annual Review of Physiology* 2020 82:1, 391-412. [https://doi.org/10.1146/annurev-physiol-021119-](https://doi.org/10.1146/annurev-physiol-021119-034602)  
614 [034602](https://doi.org/10.1146/annurev-physiol-021119-034602).

615 Plans-Rubió P.. The vaccination coverage required to establish herd immunity against influenza  
616 viruses. *Preventive Medicine*, Vol 55(1), July 2012, 72-77.  
617 <https://doi.org/10.1016/j.ypmed.2012.02.015>.

618 Postnikov, E. (2016). Dynamical prediction of flu seasonality driven by ambient temperature:  
619 influenza vs. common cold. *Eur. Phys. J. B* 89, 13. <https://doi.org/10.1140/epjb/e2015-50845-7>

620 Rosenwasser, L. J. (2011). Current Understanding of the Pathophysiology of Allergic Rhinitis.  
621 *Immunology and Allergy Clinics*, Vol 31(3), p 433 – 439.

622 Qi H., Xiao S., Shi R., Ward M.P., Chen Y., Tu W., Su Q., Wang W., Wang X. & Zhang Z. COVID-  
623 19 transmission in Mainland China is associated with temperature and humidity: A time-series  
624 analysis. *Science of The Total Environment* Volume 728, 1 August 2020, 138778.  
625 <https://doi.org/10.1016/j.scitotenv.2020.138778>

- 626 Sajadi, M.M., Habibzadeh, P., Vintzileos, A., Shokouhi, S., Miralles-Wilhelm, F., & Amoroso, A.  
627 Temperature, Humidity and Latitude Analysis to Predict Potential Spread and Seasonality for COVID-  
628 19 (March 5, 2020). <http://dx.doi.org/10.2139/ssrn.3550308>
- 629 Schuit M., Gardner S., Wood S., Bower K., Williams G., Freeburger D., Dabisch P. The Influence of  
630 Simulated Sunlight on the Inactivation of Influenza Virus in Aerosols, *The Journal of Infectious*  
631 *Diseases*, Vol 221(3), February 2020, p 372–378, <https://doi.org/10.1093/infdis/jiz582>.
- 632 Shaman J., Goldstein E. & Lipsitch M. (2011) Absolute Humidity and Pandemic Versus Epidemic  
633 Influenza, *American Journal of Epidemiology*, Vol 173(2), January 2011, p 127–135,  
634 <https://doi.org/10.1093/aje/kwq347>
- 635 Soebiyanto R.P., Clara W., Jara J., Castillo L., Sorto O.R., Marinero S., Barnett de Antinori M.E.,  
636 McCracken J.P., Widdowson M.A., Azziz-Baumgartner E., & Kiang R.K. (2014). The Role of  
637 Temperature and Humidity on Seasonal Influenza in Tropical Areas: Guatemala, El Salvador and  
638 Panama, 2008–2013. *PLoS One* 9(6): e100659. Published online 2014 Jun 23. doi:  
639 10.1371/journal.pone.0100659
- 640 Tamerius, J., Nelson, M. I., Zhou, S. Z., Viboud, C., Miller, M. A., & Alonso, W. J. (2011). Global  
641 influenza seasonality: reconciling patterns across temperate and tropical regions. *Environmental health*  
642 *perspectives*, 119(4), 439–445. <https://doi.org/10.1289/ehp.1002383>.
- 643 Tan D.X. & Ruegiger Hardeland R. (2020). Potential utility of melatonin in deadly infectious diseases  
644 related to the overreaction of innate immune response and destructive inflammation: focus on COVID-  
645 19. Melatonin in deadly virus infection. *Melatonin Research* Vol 3(1). DOI:  
646 <https://doi.org/10.32794/mr11250052>
- 647 Tosepu R., Gunawan J., Effendy D.S. Ahmad L.O.A.I., Lestari H., Bahar H. & Asfiang P. Correlation  
648 between weather and Covid-19 pandemic in Jakarta, Indonesia. *Science of The Total Environment*,  
649 Volume 725, 10 July 2020, 138436. <https://doi.org/10.1016/j.scitotenv.2020.138436>



- 650 Van De Ven M.O.M., Van Den Eijnden R.J.J.M., Engels R.C.M.E. Atopic diseases and related risk  
651 factors among Dutch adolescents, *European Journal of Public Health*, Vol 16(5), October 2006, p  
652 549–558, <https://doi.org/10.1093/eurpub/ckl022>.
- 653 Wan, Y. et al. (2020). J. Virol. Receptor Recognition by the Novel Coronavirus from Wuhan: an  
654 Analysis Based on Decade-Long Structural Studies of SARS Coronavirus. [Epub ahead of print].  
655 <https://jvi.asm.org/content/94/7/e00127-20.long>
- 656 Xie J. & Zhu Y. Association between ambient temperature and COVID-19 infection in 122 cities from  
657 China. *Science of The Total Environment* Volume 724, 1 July 2020, 138201.  
658 <https://doi.org/10.1016/j.scitotenv.2020.138201>
- 659 Yao Y., Pan J.H., Liu Z.X., Meng X., Wang W.D., Kan H.D. & Wang W.B. (2020). No Association of  
660 COVID-19 transmission with temperature or UV radiation in Chinese cities. *European Respiratory*  
661 *Journal* 2020; DOI: 10.1183/13993003.00517-2020
- 662 Zhang, J-J, Dong, X, Cao, Y-Y, et al. Clinical characteristics of 140 patients infected with SARS-  
663 CoV-2 in Wuhan, China. *Allergy*. 2020; 00: 1– 12. <https://doi.org/10.1111/all.14238>
